# Supplementary material for: Multiple Sclerosis Risk Variant HLA-DRB1*1501 Associates with High Expression of DRB1 Gene in Different Human Populations
Source: PubMed Central journal article supplement (PMC3258250; doi:10.1371/journal.pone.0029819), 2012-01-13
Supplement: pone.0029819.s001.pdf [file pone.0029819.s001.pdf]

### CHB

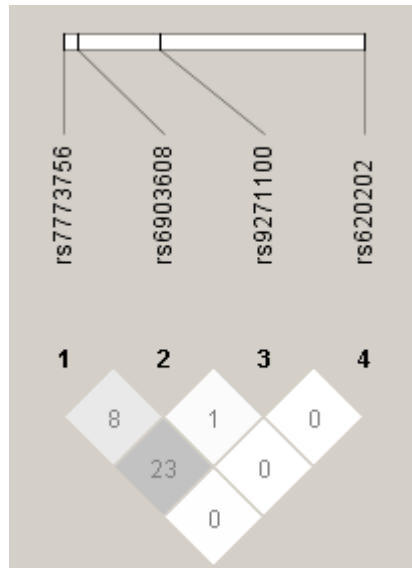

CCCG .251  
CTCG .244  
TTCG .202  
**TCTG .071**  
CCCT .056  
TTTG .053  
TTCT .041  
CTCT .038  
TTTT .018  
TCTT .011

### JPT

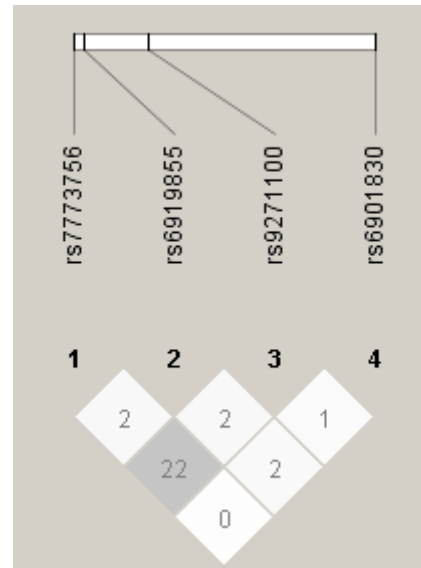

TTTCG .349  
CTCG .261  
TTTG .181  
CCCG .122  
**TCTG .081**

### CEU

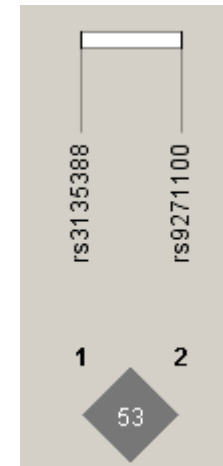

GC .677  
AT .202  
**GT .121**
