# Supplementary material for: Multiple Sclerosis Risk Variant HLA-DRB1*1501 Associates with High Expression of DRB1 Gene in Different Human Populations
Source: PLoS One. 2012 Jan 13;7(1):e29819. doi: 10.1371/journal.pone.0029819 (PMC3258250; doi:10.1371/journal.pone.0029819)
Supplement: Table S1 — Spearman correlation test of variants associated with DRB1 expression in different human populations. (XLSX) [file pone.0029819.s002.xlsx]

## Sheet: CEU
SNP_label	rvalue	pvalue	(-logP)	10000permutationsAdjustedPVal	-log10(adjustedPVal)	PERM	Threshold_0_05	Threshold_0_01	Threshold_0_001	Threshold_0_0001
rs3828916	0.53654	2.57261e-09	8.58963	0.048	1.31876	0.05	0.534725	0.581477	0.641574	0.684373
rs1109771	-0.554706	5.66279e-10	9.24697	0.0252	1.5986	0.05
rs431722	-0.600242	8.30123e-12	11.0809	0.0052	2.284	0.01
rs9267955	0.548134	9.89397e-10	9.00463	0.0323	1.4908	0.05
rs6457535	0.548134	9.89397e-10	9.00463	0.0323	1.4908	0.05
rs6904608	0.550556	8.06678e-10	9.0933	0.0299	1.52433	0.05
rs12528797	0.550312	8.23508e-10	9.08433	0.0303	1.51856	0.05
rs2894253	0.550312	8.23508e-10	9.08433	0.0303	1.51856	0.05
rs6930777	0.550312	8.23508e-10	9.08433	0.0303	1.51856	0.05
rs9268528	-0.543319	1.47797e-09	8.83034	0.0379	1.42136	0.05
rs2395166	0.636926	1.64724e-13	12.7832	0.0013	2.88606	0.01
rs3135350	0.539081	2.09297e-09	8.67924	0.0449	1.34775	0.05
rs3135344	0.788487	6.71077e-24	23.1732	0	inf	0.0001
rs17496307	0.538117	2.26395e-09	8.64513	0.0459	1.33819	0.05
rs3129860	0.539081	2.09297e-09	8.67924	0.0449	1.34775	0.05
rs3129868	0.539081	2.09297e-09	8.67924	0.0449	1.34775	0.05
rs9268644	0.650946	3.19322e-14	13.4958	0.0009	3.04576	0.001
rs6926374	-0.587846	2.79734e-11	10.5533	0.0078	2.10791	0.01
rs17496549	0.54809	9.93069e-10	9.00302	0.0324	1.48945	0.05
rs9268658	-0.623359	7.45335e-13	12.1276	0.0022	2.65758	0.01
rs3135391	0.539081	2.09297e-09	8.67924	0.0449	1.34775	0.05
rs2239804	-0.623359	7.45335e-13	12.1276	0.0022	2.65758	0.01
rs2239803	-0.609773	3.14642e-12	11.5022	0.0035	2.45593	0.01
rs2239802	0.582287	4.74413e-11	10.3238	0.0098	2.00877	0.01
rs4935356	-0.622432	8.24156e-13	12.084	0.0022	2.65758	0.01
rs7197	0.582287	4.74413e-11	10.3238	0.0098	2.00877	0.01
rs3135388	0.539081	2.09297e-09	8.67924	0.0449	1.34775	0.05
rs3129889	0.539081	2.09297e-09	8.67924	0.0449	1.34775	0.05
rs9268831	0.654462	2.08772e-14	13.6803	0.0008	3.09691	0.001
rs9268852	0.590299	2.20845e-11	10.6559	0.0071	2.14874	0.01
rs9268877	0.589354	2.4197e-11	10.6162	0.0074	2.13077	0.01
rs9268923	-0.660545	9.87534e-15	14.0054	0.0005	3.30103	0.001
rs9268969	-0.67974	8.26928e-16	15.0825	0.0003	3.52288	0.001
rs9268979	0.582928	4.46622e-11	10.3501	0.0096	2.01773	0.01
rs9405040	-0.587408	2.91726e-11	10.535	0.008	2.09691	0.01
rs9286790	-0.583662	4.16698e-11	10.3802	0.0091	2.04096	0.01
rs5026743	0.768494	4.3711e-22	21.3594	0	inf	0.0001
rs9269065	-0.686496	3.30155e-16	15.4813	0.0002	3.69897	0.0001
rs9269069	0.76995	3.27113e-22	21.4853	0	inf	0.0001
rs9269070	0.730375	4.37091e-19	18.3594	0	inf	0.0001
rs9269071	0.76995	3.27113e-22	21.4853	0	inf	0.0001
rs9269080	0.76995	3.27113e-22	21.4853	0	inf	0.0001
rs7755212	0.745995	2.99121e-20	19.5242	0	inf	0.0001
rs7739203	0.768542	4.32948e-22	21.3636	0	inf	0.0001
rs7739357	0.743081	5.00656e-20	19.3005	0	inf	0.0001
rs9405112	-0.587408	2.91726e-11	10.535	0.008	2.09691	0.01
rs35465556	0.583651	4.17137e-11	10.3797	0.0091	2.04096	0.01
rs6916742	0.663665	6.68098e-15	14.1752	0.0004	3.39794	0.001
rs1137498	-0.590672	2.13024e-11	10.6716	0.0068	2.16749	0.01
rs34249660	0.565921	2.1238e-10	9.67289	0.0171	1.767	0.05
rs28760027	0.565921	2.1238e-10	9.67289	0.0171	1.767	0.05
rs28495356	0.565921	2.1238e-10	9.67289	0.0171	1.767	0.05
rs35571839	0.583651	4.17137e-11	10.3797	0.0091	2.04096	0.01
rs28490179	0.588842	2.54187e-11	10.5948	0.0076	2.11919	0.01
rs34569694	0.862909	6.77716e-33	32.169	0	inf	0.0001
rs28656080	0.548677	9.45305e-10	9.02443	0.0317	1.49894	0.05
rs28530648	0.565921	2.1238e-10	9.67289	0.0171	1.767	0.05
rs35464393	0.555062	5.49225e-10	9.26025	0.025	1.60206	0.05
rs35366052	0.57447	9.8068e-11	10.0085	0.0127	1.8962	0.05
rs9269329	0.871664	2.68513e-34	33.571	0	inf	0.0001
rs9269491	0.888551	2.5637e-37	36.5911	0	inf	0.0001
rs3830135	0.583651	4.17137e-11	10.3797	0.0091	2.04096	0.01
rs701831	0.644709	6.69481e-14	13.1743	0.001	3	0.001
rs9269902	-0.570677	1.3855e-10	9.85839	0.0145	1.83863	0.05
rs9270467	0.891389	7.13802e-38	37.1464	0	inf	0.0001
rs28605404	0.583651	4.17137e-11	10.3797	0.0091	2.04096	0.01
rs9270856	0.891508	6.76088e-38	37.17	0	inf	0.0001
rs9270984	0.588961	2.51303e-11	10.5998	0.0076	2.11919	0.01
rs9270986	0.588961	2.51303e-11	10.5998	0.0076	2.11919	0.01
rs9271055	0.588961	2.51303e-11	10.5998	0.0076	2.11919	0.01
rs9271100	0.891508	6.76088e-38	37.17	0	inf	0.0001
rs9271170	0.891508	6.76088e-38	37.17	0	inf	0.0001
rs4530903	0.583651	4.17137e-11	10.3797	0.0091	2.04096	0.01
rs522308	-0.596078	1.2557e-11	10.9011	0.0057	2.24413	0.01
rs3129757	0.603402	6.0396e-12	11.219	0.0045	2.34679	0.01
rs3135005	0.603402	6.0396e-12	11.219	0.0045	2.34679	0.01
rs9271366	0.539253	2.06381e-09	8.68533	0.0448	1.34872	0.05
rs9271367	0.880845	6.97654e-36	35.1564	0	inf	0.0001
rs9271567	-0.557579	4.42024e-10	9.35455	0.0232	1.63451	0.05
rs2097431	0.768149	4.68048e-22	21.3297	0	inf	0.0001
rs17599077	0.547486	1.04476e-09	8.98098	0.033	1.48149	0.05
rs9271605	-0.541908	1.66034e-09	8.7798	0.0399	1.39903	0.05
rs3129766	-0.578661	6.66e-11	10.1765	0.0111	1.95468	0.05
rs34217071	0.56206	2.98903e-10	9.52447	0.0197	1.70553	0.05
rs3129768	0.658124	1.33306e-14	13.8751	0.0006	3.22185	0.001
rs9272346	0.676125	1.33816e-15	14.8735	0.0003	3.52288	0.001
rs35632780	0.553614	6.21827e-10	9.20633	0.0262	1.5817	0.05
rs9272723	0.710363	1.0457e-17	16.9806	0	inf	0.0001
rs6927022	0.571482	1.28798e-10	9.89009	0.0143	1.84466	0.05
rs17843593	0.676125	1.33816e-15	14.8735	0.0003	3.52288	0.001
rs17843604	0.656311	1.66581e-14	13.7784	0.0007	3.1549	0.001
rs17843608	0.676125	1.33816e-15	14.8735	0.0003	3.52288	0.001
rs35367950	0.676125	1.33816e-15	14.8735	0.0003	3.52288	0.001
rs9273349	0.676125	1.33816e-15	14.8735	0.0003	3.52288	0.001
rs6928482	-0.596517	1.20239e-11	10.92	0.0056	2.25181	0.01
rs1063355	0.676125	1.33816e-15	14.8735	0.0003	3.52288	0.001
rs3134996	0.743389	4.74225e-20	19.324	0	inf	0.0001
rs9274689	0.556088	5.0283e-10	9.29858	0.0243	1.61439	0.05
rs9274741	0.591488	1.96813e-11	10.7059	0.0067	2.17393	0.01
rs2858330	-0.553168	6.45985e-10	9.18978	0.0267	1.57349	0.05
rs35998847	0.535841	2.7221e-09	8.5651	0.049	1.3098	0.05
rs3104405	0.674069	1.75403e-15	14.756	0.0004	3.39794	0.001
rs3104410	0.553013	6.54601e-10	9.18402	0.027	1.56864	0.05
rs735883	-0.561884	3.03578e-10	9.51773	0.0197	1.70553	0.05

## Sheet: YRI
SNP_label	rvalue	pvalue	(-logP)	10000permutationsAdjustedPVal	-log10(adjustedPVal)	PERM	Threshold_0_05	Threshold_0_01	Threshold_0_001	Threshold_0_0001
rs805285	-0.591399	1.59347e-11	10.7977	0.0076	2.11919	0.01	0.537199	0.582877	0.638207	0.67197
rs6935715	0.572769	9.34933e-11	10.0292	0.0144	1.84164	0.05
rs6912701	0.607995	2.98757e-12	11.5247	0.0041	2.38722	0.01
rs1137498	-0.638052	1.11007e-13	12.9547	0.0012	2.92082	0.01
rs2157337	-0.550521	6.72353e-10	9.1724	0.0311	1.50724	0.05
rs28490179	0.679717	6.05629e-16	15.2178	0.0002	3.69897	0.0001
rs34569694	0.850485	2.40734e-31	30.6185	0	inf	0.0001
rs35464393	0.670584	2.0395e-15	14.6905	0.0003	3.52288	0.001
rs35366052	0.684724	3.05448e-16	15.5151	0	inf	0.0001
rs9269329	0.837022	1.60225e-29	28.7953	0	inf	0.0001
rs9269491	0.837022	1.60225e-29	28.7953	0	inf	0.0001
rs701831	0.598371	7.97987e-12	11.098	0.0059	2.22915	0.01
rs9270207	-0.71649	2.82758e-18	17.5486	0	inf	0.0001
rs9270467	0.832718	5.66139e-29	28.2471	0	inf	0.0001
rs9270657	-0.622426	6.42539e-13	12.1921	0.0022	2.65758	0.01
rs9270856	0.839814	6.92739e-30	29.1594	0	inf	0.0001
rs9270984	0.681039	5.06149e-16	15.2957	0	inf	0.0001
rs9270986	0.678089	7.5431e-16	15.1225	0.0002	3.69897	0.0001
rs615672	-0.642056	6.96453e-14	13.1571	0.001	3	0.001
rs2858867	-0.632484	2.09899e-13	12.678	0.0013	2.88606	0.01
rs9271055	0.678089	7.5431e-16	15.1225	0.0002	3.69897	0.0001
rs9271100	0.837022	1.60225e-29	28.7953	0	inf	0.0001
rs9271170	0.839814	6.92739e-30	29.1594	0	inf	0.0001
rs5021728	-0.550786	6.57267e-10	9.18226	0.0304	1.51713	0.05
rs502771	-0.550786	6.57267e-10	9.18226	0.0304	1.51713	0.05
rs3135005	0.601777	5.65722e-12	11.2474	0.0051	2.29243	0.01
rs9271366	0.672286	1.63171e-15	14.7874	0.0002	3.69897	0.0001
rs9271367	0.660591	7.33753e-15	14.1345	0.0005	3.30103	0.001
rs2097432	-0.610484	2.30467e-12	11.6374	0.0033	2.48149	0.01
rs2097431	0.636714	1.29515e-13	12.8877	0.0012	2.92082	0.01

## Sheet: CHB
SNP_label	rvalue	pvalue	(-logP)	10000permutationsAdjustedPVal	-log10(adjustedPVal)	PERM	Threshold_0_05	Threshold_0_01	Threshold_0_001	Threshold_0_0001
rs9268517	-0.625331	5.61447e-10	9.25069	0.019	1.72125"	0.05	0.595	0.644075	0.697405	0.731893
rs3135365	0.661694	2.3533e-11	10.6283	0.0058	2.23657"	0.01
rs2157337	-0.658157	3.26565e-11	10.486	0.0065	2.18709"	0.01
rs34369284	-0.653249	5.10841e-11	10.2917	0.0078	2.10791"	0.01
rs28490179	0.70647	2.45714e-13	12.6096	0.0008	3.09691"	0.001
rs35464393	0.688901	1.62233e-12	11.7899	0.0019	2.72125"	0.01
rs12661707	-0.613738	1.41853e-09	8.84816	0.0284	1.54668"	0.05
rs35366052	0.713065	1.16689e-13	12.933	0.0007	3.1549"	0.001
rs9269329	0.767085	1.07077e-16	15.9703	0	inf"	0.0001
rs9269491	0.770906	6.08164e-17	16.216	0	inf"	0.0001
rs9270467	0.770906	6.08164e-17	16.216	0	inf"	0.0001
rs9270657	-0.647537	8.51128e-11	10.07	0.0092	2.03621"	0.01
rs9270856	0.770906	6.08164e-17	16.216	0	inf"	0.0001
rs9270984	0.715255	9.06969e-14	13.0424	0.0007	3.1549"	0.001
rs9270986	0.715255	9.06969e-14	13.0424	0.0007	3.1549"	0.001
rs9271055	0.715255	9.06969e-14	13.0424	0.0007	3.1549"	0.001
rs9271100	0.770906	6.08164e-17	16.216	0	inf"	0.0001
rs9271170	0.770906	6.08164e-17	16.216	0	inf"	0.0001
rs3135005	0.656185	3.91261e-11	10.4075	0.0069	2.16115"	0.01
rs9271366	0.639866	1.66161e-10	9.77947	0.0117	1.93181"	0.05

## Sheet: JPT
SNP_label	rvalue	pvalue	(-logP)	10000permutationsAdjustedPVal	-log10(adjustedPVal)	PERM	Threshold_0_05	Threshold_0_01	Threshold_0_001	Threshold_0_0001
rs3094188	0.613147	9.1599e-10	9.03811	0.0269	1.57025"	0.05	0.592744	0.640604	0.699991	0.735968
rs3130941	0.616065	7.24081e-10	9.14021	0.0246	1.60906"	0.05
rs3134782	0.608577	1.31719e-09	8.88035	0.0304	1.51713"	0.05
rs3130712	0.620402	5.08303e-10	9.29388	0.0212	1.67366"	0.05
rs6923313	0.623561	3.91494e-10	9.40728	0.0192	1.7167"	0.05
rs3132486	0.643098	7.27828e-11	10.138	0.0094	2.02687"	0.01
rs9264733	0.668743	6.60131e-12	11.1804	0.0034	2.46852"	0.01
rs9264740	0.662523	1.20724e-11	10.9182	0.0045	2.34679"	0.01
rs6919908	0.629502	2.37657e-10	9.62405	0.0151	1.82102"	0.05
rs6906846	0.636462	1.30628e-10	9.88396	0.0125	1.90309"	0.05
rs2518027	0.707	1.14423e-13	12.9415	0.0008	3.09691"	0.001
rs2844508	0.689508	7.89316e-13	12.1027	0.0018	2.74473"	0.01
rs2844507	0.675136	3.49618e-12	11.4564	0.0022	2.65758"	0.01
rs2523671	0.707031	1.14017e-13	12.943	0.0008	3.09691"	0.001
rs2596449	0.667062	7.78177e-12	11.1089	0.0037	2.4318"	0.01
rs2523666	0.707031	1.14017e-13	12.943	0.0008	3.09691"	0.001
rs2844505	0.667062	7.78177e-12	11.1089	0.0037	2.4318"	0.01
rs2523663	0.650269	3.80666e-11	10.4195	0.0071	2.14874"	0.01
rs2596446	0.682276	1.68685e-12	11.7729	0.0021	2.67778"	0.01
rs6915833	0.598249	2.93206e-09	8.53283	0.0423	1.37366"	0.05
rs3130055	0.638218	1.12052e-10	9.95058	0.0118	1.92812"	0.05
rs2075582	0.638218	1.12052e-10	9.95058	0.0118	1.92812"	0.05
rs1055388	0.638218	1.12052e-10	9.95058	0.0118	1.92812"	0.05
rs2075580	0.652082	3.22232e-11	10.4918	0.0065	2.18709"	0.01
rs933208	0.638218	1.12052e-10	9.95058	0.0118	1.92812"	0.05
rs2071595	0.604678	1.78781e-09	8.74768	0.0353	1.45223"	0.05
rs7738430	0.608868	1.28735e-09	8.8903	0.03	1.52288"	0.05
rs2523507	0.638218	1.12052e-10	9.95058	0.0118	1.92812"	0.05
rs2239528	0.638218	1.12052e-10	9.95058	0.0118	1.92812"	0.05
rs2523504	0.638218	1.12052e-10	9.95058	0.0118	1.92812"	0.05
rs3219183	0.628054	2.68668e-10	9.57078	0.016	1.79588"	0.05
rs2857605	0.622148	4.40163e-10	9.35639	0.0196	1.70774"	0.05
rs2239707	0.596495	3.34932e-09	8.47504	0.0445	1.35164"	0.05
rs2515920	0.628054	2.68668e-10	9.57078	0.016	1.79588"	0.05
rs3135365	0.614775	8.03615e-10	9.09495	0.0256	1.59176"	0.05
rs7754731	-0.645238	6.00921e-11	10.2212	0.0087	2.06048"	0.01
rs1137498	-0.626607	3.03503e-10	9.51784	0.0165	1.78252"	0.05
rs2157337	-0.658218	1.81812e-11	10.7404	0.0051	2.29243"	0.01
rs34369284	-0.65876	1.72743e-11	10.7626	0.005	2.30103"	0.01
rs28490179	0.65767	1.91445e-11	10.718	0.0056	2.25181"	0.01
rs34569694	0.858982	5.69111e-25	24.2448	0	inf"	0.0001
rs35464393	0.66746	7.48536e-12	11.1258	0.0037	2.4318"	0.01
rs35366052	0.66746	7.48536e-12	11.1258	0.0037	2.4318"	0.01
rs9269329	0.8626	2.16587e-25	24.6644	0	inf"	0.0001
rs9269491	0.869693	3.00302e-26	25.5224	0	inf"	0.0001
rs701831	0.623794	3.83978e-10	9.41569	0.0188	1.72584"	0.05
rs9269902	-0.642207	7.87978e-11	10.1035	0.0094	2.02687"	0.01
rs9270467	0.860817	3.49895e-25	24.4561	0	inf"	0.0001
rs9270657	-0.64004	9.54695e-11	10.0201	0.0105	1.97881"	0.05
rs9270856	0.869693	3.00302e-26	25.5224	0	inf"	0.0001
rs9270984	0.680698	1.98513e-12	11.7022	0.0021	2.67778"	0.01
rs9270986	0.680698	1.98513e-12	11.7022	0.0021	2.67778"	0.01
rs615672	-0.692253	5.88217e-13	12.2305	0.0016	2.79588"	0.01
rs2858867	-0.679427	2.26167e-12	11.6456	0.0021	2.67778"	0.01
rs9271055	0.680698	1.98513e-12	11.7022	0.0021	2.67778"	0.01
rs9271100	0.869693	3.00302e-26	25.5224	0	inf"	0.0001
rs9271170	0.869693	3.00302e-26	25.5224	0	inf"	0.0001
rs9271348	0.700239	2.45393e-13	12.6101	0.0011	2.95861"	0.001
rs3135005	0.676779	2.96184e-12	11.5284	0.0021	2.67778"	0.01
rs9271366	0.680698	1.98513e-12	11.7022	0.0021	2.67778"	0.01
rs9271367	0.686894	1.04133e-12	11.9824	0.0019	2.72125"	0.01
rs9271567	-0.615483	7.59014e-10	9.11975	0.025	1.60206"	0.05
rs2395225	-0.637571	1.18577e-10	9.926	0.0119	1.92445"	0.05
rs2097431	0.662309	1.23222e-11	10.9093	0.0045	2.34679"	0.01
rs2071538	0.682249	1.69166e-12	11.7717	0.0021	2.67778"	0.01
rs1383266	0.690348	7.21694e-13	12.1416	0.0018	2.74473"	0.01
rs9276922	0.682249	1.69166e-12	11.7717	0.0021	2.67778"	0.01
rs150359	-0.610765	1.10775e-09	8.95556	0.0284	1.54668"	0.05
rs206787	-0.610765	1.10775e-09	8.95556	0.0284	1.54668"	0.05
rs635688	-0.610765	1.10775e-09	8.95556	0.0284	1.54668"	0.05
rs184054	0.599307	2.70488e-09	8.56785	0.0409	1.38828"	0.05
rs579615	-0.610765	1.10775e-09	8.95556	0.0284	1.54668"	0.05
rs172276	0.599307	2.70488e-09	8.56785	0.0409	1.38828"	0.05
rs211450	-0.625567	3.31148e-10	9.47998	0.0172	1.76447"	0.05

## Sheet: GIH
SNP_label	rvalue	pvalue	(-logP)	10000permutationsAdjustedPVal	-log10(adjustedPVal)	PERM	Threshold_0_05	Threshold_0_01	Threshold_0_001	Threshold_0_0001
rs10947233	0.454539	1.789e-05	4.74739	0.0271	1.56703	0.05	0.441814	0.475644	0.522712	0.578342
rs2070600	0.454539	1.789e-05	4.74739	0.0271	1.56703	0.05
rs384247	0.463333	1.16803e-05	4.93255	0.019	1.72125	0.05
rs2256594	0.463333	1.16803e-05	4.93255	0.019	1.72125	0.05
rs12524063	0.468807	8.90419e-06	5.05041	0.0143	1.84466	0.05
rs10484560	0.468807	8.90419e-06	5.05041	0.0143	1.84466	0.05
rs12526151	0.468807	8.90419e-06	5.05041	0.0143	1.84466	0.05
rs1265763	0.483519	4.19369e-06	5.3774	0.0067	2.17393	0.01
rs1265762	0.479728	5.10857e-06	5.2917	0.0085	2.07058	0.01
rs1265760	0.479728	5.10857e-06	5.2917	0.0085	2.07058	0.01
rs1265759	0.479728	5.10857e-06	5.2917	0.0085	2.07058	0.01
rs1265758	0.479728	5.10857e-06	5.2917	0.0085	2.07058	0.01
rs9268302	0.483519	4.19369e-06	5.3774	0.0067	2.17393	0.01
rs6907322	0.483519	4.19369e-06	5.3774	0.0067	2.17393	0.01
rs2395150	0.479728	5.10857e-06	5.2917	0.0085	2.07058	0.01
rs9268303	0.483519	4.19369e-06	5.3774	0.0067	2.17393	0.01
rs6904636	0.479728	5.10857e-06	5.2917	0.0085	2.07058	0.01
rs9268330	0.47043	8.20835e-06	5.08574	0.0133	1.87615	0.05
rs7744155	0.479079	5.283e-06	5.27712	0.0085	2.07058	0.01
rs9268347	0.483519	4.19369e-06	5.3774	0.0067	2.17393	0.01
rs3129922	0.479728	5.10857e-06	5.2917	0.0085	2.07058	0.01
rs9268364	0.483519	4.19369e-06	5.3774	0.0067	2.17393	0.01
rs9268365	0.483519	4.19369e-06	5.3774	0.0067	2.17393	0.01
rs2273017	0.502639	1.49405e-06	5.82563	0.0033	2.48149	0.01
rs3117106	0.45681	1.60428e-05	4.79472	0.0255	1.59346	0.05
rs3117099	0.662263	1.23772e-11	10.9074	0	inf	0.0001
rs7744293	0.471762	7.6757e-06	5.11488	0.0123	1.91009	0.05
rs2076531	0.442681	3.12142e-05	4.50565	0.0479	1.31966	0.05
rs2076528	0.442681	3.12142e-05	4.50565	0.0479	1.31966	0.05
rs2076527	0.442681	3.12142e-05	4.50565	0.0479	1.31966	0.05
rs3117116	0.470822	8.04818e-06	5.0943	0.0129	1.88941	0.05
rs9268528	-0.533101	2.52063e-07	6.59849	0.0007	3.1549	0.001
rs9268542	-0.533101	2.52063e-07	6.59849	0.0007	3.1549	0.001
rs3135365	0.77184	2.11135e-17	16.6754	0	inf	0.0001
rs9268557	0.489181	3.10929e-06	5.50734	0.0054	2.26761	0.01
rs9268560	0.474394	6.71734e-06	5.1728	0.0106	1.97469	0.05
rs2187818	-0.55981	4.55545e-08	7.34147	0.0004	3.39794	0.001
rs9268585	-0.55981	4.55545e-08	7.34147	0.0004	3.39794	0.001
rs9268589	-0.577513	1.34562e-08	7.87108	0.0003	3.52288	0.001
rs7756262	-0.577513	1.34562e-08	7.87108	0.0003	3.52288	0.001
rs9268606	-0.577513	1.34562e-08	7.87108	0.0003	3.52288	0.001
rs984778	0.634507	1.5477e-10	9.81031	0	inf	0.0001
rs9501626	0.47037	8.23324e-06	5.08443	0.0133	1.87615	0.05
rs3129860	0.506373	1.2123e-06	5.91639	0.0027	2.56864	0.01
rs3135338	0.634507	1.5477e-10	9.81031	0	inf	0.0001
rs7773756	-0.577513	1.34562e-08	7.87108	0.0003	3.52288	0.001
rs2027856	0.47037	8.23324e-06	5.08443	0.0133	1.87615	0.05
rs9268615	-0.577513	1.34562e-08	7.87108	0.0003	3.52288	0.001
rs3129868	0.468418	9.07902e-06	5.04196	0.0145	1.83863	0.05
rs2395173	0.634507	1.5477e-10	9.81031	0	inf	0.0001
rs3135395	0.634507	1.5477e-10	9.81031	0	inf	0.0001
rs3129871	0.509846	9.95915e-07	6.00178	0.002	2.69897	0.01
rs9268645	-0.614259	8.37699e-10	9.07691	0	inf	0.0001
rs2395182	0.529339	3.17025e-07	6.49891	0.001	3	0.001
rs7754768	0.625032	3.46327e-10	9.46051	0	inf	0.0001
rs9268831	0.598196	2.94395e-09	8.53107	0.0002	3.69897	0.0001
rs9268832	0.612841	9.38654e-10	9.02749	0	inf	0.0001
rs6901541	0.619529	5.46067e-10	9.26275	0	inf	0.0001
rs11757500	0.503943	1.38925e-06	5.85722	0.0031	2.50864	0.01
rs1137498	-0.813614	1.56411e-20	19.8057	0	inf	0.0001
rs2157337	-0.55663	5.62924e-08	7.24955	0.0004	3.39794	0.001
rs34369284	-0.552196	7.53314e-08	7.12302	0.0005	3.30103	0.001
rs28490179	0.825671	1.38521e-21	20.8585	0	inf	0.0001
rs34569694	0.846826	1.21243e-23	22.9163	0	inf	0.0001
rs35464393	0.798182	2.7271e-19	18.5643	0	inf	0.0001
rs35366052	0.809189	3.64546e-20	19.4382	0	inf	0.0001
rs9269329	0.881771	7.83078e-28	27.1062	0	inf	0.0001
rs9269491	0.882138	6.96628e-28	27.157	0	inf	0.0001
rs9269637	-0.55835	5.02184e-08	7.29914	0.0004	3.39794	0.001
rs9269902	-0.808322	4.29128e-20	19.3674	0	inf	0.0001
rs9270467	0.881355	8.93739e-28	27.0488	0	inf	0.0001
rs9270856	0.883066	5.1747e-28	27.2861	0	inf	0.0001
rs9270984	0.825671	1.38521e-21	20.8585	0	inf	0.0001
rs9270986	0.823552	2.14905e-21	20.6678	0	inf	0.0001
rs9271055	0.825671	1.38521e-21	20.8585	0	inf	0.0001
rs9271100	0.883066	5.1747e-28	27.2861	0	inf	0.0001
rs9271170	0.883066	5.1747e-28	27.2861	0	inf	0.0001
rs9271348	0.623973	3.78303e-10	9.42216	0	inf	0.0001
rs3135005	0.817497	7.30721e-21	20.1362	0	inf	0.0001
rs9271366	0.825954	1.30565e-21	20.8842	0	inf	0.0001
rs9271367	0.8331	2.8299e-22	21.5482	0	inf	0.0001
rs34012154	0.474688	6.61742e-06	5.17931	0.0104	1.98297	0.05
rs2097431	0.613195	9.12447e-10	9.03979	0	inf	0.0001
rs9271775	0.790548	1.02527e-18	17.9892	0	inf	0.0001
rs9272105	-0.495015	2.27166e-06	5.64366	0.0046	2.33724	0.01
rs9272143	-0.46879	8.91161e-06	5.05004	0.0143	1.84466	0.05
rs3104369	0.613004	9.26515e-10	9.03315	0	inf	0.0001
rs9272346	0.47122	7.88833e-06	5.10301	0.0127	1.8962	0.05
rs9272723	0.469747	8.49457e-06	5.07086	0.0139	1.85699	0.05
rs35185501	0.446986	2.55634e-05	4.59238	0.0394	1.4045	0.05
rs17843593	0.47122	7.88833e-06	5.10301	0.0127	1.8962	0.05
rs17843604	0.454165	1.82127e-05	4.73963	0.0273	1.56384	0.05
rs17843608	0.475002	6.51237e-06	5.18626	0.0102	1.9914	0.05
rs35367950	0.47122	7.88833e-06	5.10301	0.0127	1.8962	0.05
rs9273349	0.47122	7.88833e-06	5.10301	0.0127	1.8962	0.05
rs1063355	0.47122	7.88833e-06	5.10301	0.0127	1.8962	0.05
rs9274183	-0.481246	4.72195e-06	5.32588	0.0075	2.12494	0.01
rs7775228	0.472214	7.5024e-06	5.1248	0.0121	1.91721	0.05
rs9469220	0.487109	3.4712e-06	5.45952	0.0058	2.23657	0.01
rs2647015	0.477504	5.72937e-06	5.24189	0.0089	2.05061	0.01
rs2858308	0.442045	3.21418e-05	4.49293	0.0497	1.30364	0.05
rs2856705	0.442045	3.21418e-05	4.49293	0.0497	1.30364	0.05
rs2858331	0.475275	6.42217e-06	5.19232	0.0102	1.9914	0.05

## Sheet: LWK
SNP_label	rvalue	pvalue	(-logP)	10000permutationsAdjustedPVal	-log10(adjustedPVal)	PERM	Threshold_0_05	Threshold_0_01	Threshold_0_001	Threshold_0_0001
rs6916062	0.500958	1.41124e-06	5.8504	0.0031	2.50864	0.01	0.441746	0.479516	0.518042	0.547066
rs28895018	0.506726	1.0186e-06	5.992	0.0021	2.67778	0.01
rs6906662	0.506726	1.0186e-06	5.992	0.0021	2.67778	0.01
rs7745174	0.452564	1.74289e-05	4.75873	0.0315	1.50169	0.05
rs9268220	0.452564	1.74289e-05	4.75873	0.0315	1.50169	0.05
rs7756177	0.481144	4.13747e-06	5.38326	0.0094	2.02687	0.01
rs28732193	0.500958	1.41124e-06	5.8504	0.0031	2.50864	0.01
rs5875359	0.481144	4.13747e-06	5.38326	0.0094	2.02687	0.01
rs1265762	-0.50248	1.29564e-06	5.88752	0.0025	2.60206	0.01
rs1265760	-0.50248	1.29564e-06	5.88752	0.0025	2.60206	0.01
rs1265759	-0.50248	1.29564e-06	5.88752	0.0025	2.60206	0.01
rs1265758	-0.477433	5.02367e-06	5.29898	0.011	1.95861	0.05
rs2395150	-0.477433	5.02367e-06	5.29898	0.011	1.95861	0.05
rs6904636	-0.50248	1.29564e-06	5.88752	0.0025	2.60206	0.01
rs3129922	-0.50248	1.29564e-06	5.88752	0.0025	2.60206	0.01
rs2143462	0.481144	4.13747e-06	5.38326	0.0094	2.02687	0.01
rs2143461	0.472291	6.54954e-06	5.18379	0.0138	1.86012	0.05
rs3129933	0.481144	4.13747e-06	5.38326	0.0094	2.02687	0.01
rs3129937	0.481144	4.13747e-06	5.38326	0.0094	2.02687	0.01
rs3129939	0.481144	4.13747e-06	5.38326	0.0094	2.02687	0.01
rs2273017	-0.50248	1.29564e-06	5.88752	0.0025	2.60206	0.01
rs7744293	0.580739	8.65137e-09	8.06292	0	inf	0.0001
rs9268493	0.551181	6.67587e-08	7.17549	0.0002	3.69897	0.0001
rs9268494	0.56031	3.62759e-08	7.44038	0.0002	3.69897	0.0001
rs9268499	0.557156	4.48782e-08	7.34796	0.0002	3.69897	0.0001
rs6926737	-0.44706	2.26592e-05	4.64476	0.0395	1.4034	0.05
rs3763311	0.548825	7.79061e-08	7.10843	0.0002	3.69897	0.0001
rs3763317	0.513664	6.82697e-07	6.16577	0.0013	2.88606	0.01
rs5007265	-0.45931	1.25563e-05	4.90114	0.0232	1.63451	0.05
rs5007263	-0.45931	1.25563e-05	4.90114	0.0232	1.63451	0.05
rs5007259	-0.45931	1.25563e-05	4.90114	0.0232	1.63451	0.05
rs6932542	-0.45931	1.25563e-05	4.90114	0.0232	1.63451	0.05
rs9501626	0.630679	1.65855e-10	9.78027	0	inf	0.0001
rs2027856	0.630679	1.65855e-10	9.78027	0	inf	0.0001
rs9268658	0.543375	1.10866e-07	6.9552	0.0004	3.39794	0.001
rs2239804	0.543375	1.10866e-07	6.9552	0.0004	3.39794	0.001
rs2239803	0.558648	4.05913e-08	7.39157	0.0002	3.69897	0.0001
rs4935356	0.543375	1.10866e-07	6.9552	0.0004	3.39794	0.001
rs28732222	-0.498932	1.58018e-06	5.80129	0.0037	2.4318	0.01
rs9268856	-0.526979	3.08862e-07	6.51023	0.0009	3.04576	0.001
rs9268862	-0.527961	2.9092e-07	6.53623	0.0009	3.04576	0.001
rs7766843	-0.527961	2.9092e-07	6.53623	0.0009	3.04576	0.001
rs7746922	-0.527961	2.9092e-07	6.53623	0.0009	3.04576	0.001
rs7747521	-0.543191	1.12183e-07	6.95007	0.0004	3.39794	0.001
rs9268878	-0.527961	2.9092e-07	6.53623	0.0009	3.04576	0.001
rs9268911	-0.527961	2.9092e-07	6.53623	0.0009	3.04576	0.001
rs9268977	-0.527961	2.9092e-07	6.53623	0.0009	3.04576	0.001
rs9268980	-0.527961	2.9092e-07	6.53623	0.0009	3.04576	0.001
rs9269043	-0.53292	2.14409e-07	6.66876	0.0008	3.09691	0.001
rs2157338	-0.527961	2.9092e-07	6.53623	0.0009	3.04576	0.001
rs2187823	-0.527961	2.9092e-07	6.53623	0.0009	3.04576	0.001
rs1137498	-0.713162	3.90286e-14	13.4086	0	inf	0.0001
rs2157337	-0.82317	1.31199e-21	20.8821	0	inf	0.0001
rs34369284	-0.82317	1.31199e-21	20.8821	0	inf	0.0001
rs28490179	0.698461	2.12596e-13	12.6724	0	inf	0.0001
rs34569694	0.858908	2.95358e-25	24.5297	0	inf	0.0001
rs35464393	0.679228	1.68396e-12	11.7737	0	inf	0.0001
rs35366052	0.693471	3.69376e-13	12.4325	0	inf	0.0001
rs9269329	0.853903	1.09278e-24	23.9615	0	inf	0.0001
rs9269491	0.861788	1.35957e-25	24.8666	0	inf	0.0001
rs9269637	-0.737457	1.85545e-15	14.7315	0	inf	0.0001
rs9270207	-0.729036	5.53467e-15	14.2569	0	inf	0.0001
rs9270467	0.856463	5.63182e-25	24.2494	0	inf	0.0001
rs9270623	-0.569758	1.89227e-08	7.72302	0	inf	0.0001
rs4599680	-0.570618	1.78159e-08	7.74919	0	inf	0.0001
rs9270856	0.861788	1.35957e-25	24.8666	0	inf	0.0001
rs602875	-0.564686	2.69035e-08	7.57019	0	inf	0.0001
rs9270984	0.698657	2.07988e-13	12.682	0	inf	0.0001
rs9270986	0.681411	1.34202e-12	11.8722	0	inf	0.0001
rs2858867	-0.765415	3.57512e-17	16.4467	0	inf	0.0001
rs9271055	0.698461	2.12596e-13	12.6724	0	inf	0.0001
rs9271100	0.861788	1.35957e-25	24.8666	0	inf	0.0001
rs9271170	0.864987	5.62562e-26	25.2498	0	inf	0.0001
rs674313	-0.533921	2.01486e-07	6.69575	0.0008	3.09691	0.001
rs5021728	-0.548344	8.03947e-08	7.09477	0.0002	3.69897	0.0001
rs502771	-0.548344	8.03947e-08	7.09477	0.0002	3.69897	0.0001
rs502055	-0.548344	8.03947e-08	7.09477	0.0002	3.69897	0.0001
rs642093	-0.564686	2.69035e-08	7.57019	0	inf	0.0001
rs9271348	0.681488	1.33118e-12	11.8758	0	inf	0.0001
rs3135005	0.695474	2.96315e-13	12.5282	0	inf	0.0001
rs9271366	0.698461	2.12596e-13	12.6724	0	inf	0.0001
rs9271367	0.753528	2.04357e-16	15.6896	0	inf	0.0001
rs2097432	-0.716891	2.49637e-14	13.6027	0	inf	0.0001
rs2097431	0.711155	4.94947e-14	13.3054	0	inf	0.0001
rs3129763	-0.498497	1.61893e-06	5.79077	0.0037	2.4318	0.01
rs9272105	-0.492076	2.30469e-06	5.63739	0.0045	2.34679	0.01
rs9272192	-0.451799	1.80807e-05	4.74278	0.0321	1.49349	0.05
rs9272219	-0.520198	4.64538e-07	6.33298	0.001	3	0.001
rs9272346	0.471561	6.79865e-06	5.16758	0.0146	1.83565	0.05
rs9272426	-0.506011	1.06097e-06	5.97429	0.0021	2.67778	0.01
rs9272535	-0.520198	4.64538e-07	6.33298	0.001	3	0.001
rs9273012	-0.520198	4.64538e-07	6.33298	0.001	3	0.001
rs9273109	-0.469285	7.63287e-06	5.11731	0.0159	1.7986	0.05
rs17843593	0.471561	6.79865e-06	5.16758	0.0146	1.83565	0.05
rs17843608	0.469163	7.68008e-06	5.11463	0.016	1.79588	0.05
rs35367950	0.48449	3.46648e-06	5.46011	0.0075	2.12494	0.01
rs9273349	0.471561	6.79865e-06	5.16758	0.0146	1.83565	0.05
rs7744001	-0.458502	1.30637e-05	4.88393	0.0243	1.61439	0.05
rs6906021	-0.468611	7.89779e-06	5.10249	0.0163	1.78781	0.05
rs1063355	0.471561	6.79865e-06	5.16758	0.0146	1.83565	0.05
rs9274183	-0.45743	1.37675e-05	4.86115	0.0253	1.59688	0.05
rs9469219	-0.4514	1.84302e-05	4.73447	0.0328	1.48413	0.05
rs2157051	0.462372	1.07947e-05	4.96679	0.0204	1.69037	0.05
rs9275614	0.517495	5.45294e-07	6.26337	0.0012	2.92082	0.01
rs9275618	0.505969	1.06353e-06	5.97325	0.0021	2.67778	0.01
rs9276298	0.457565	1.36765e-05	4.86402	0.0251	1.60033	0.05
rs7773068	0.457565	1.36765e-05	4.86402	0.0251	1.60033	0.05
rs7773694	0.457565	1.36765e-05	4.86402	0.0251	1.60033	0.05
rs7755596	0.457565	1.36765e-05	4.86402	0.0251	1.60033	0.05
rs2213565	0.457565	1.36765e-05	4.86402	0.0251	1.60033	0.05
rs35564723	-0.512999	7.09669e-07	6.14894	0.0013	2.88606	0.01

## Sheet: MEX
SNP_label	rvalue	pvalue	(-logP)	10000permutationsAdjustedPVal	-log10(adjustedPVal)	PERM	Threshold_0_05	Threshold_0_01	Threshold_0_001	Threshold_0_0001
rs35465556	0.629417	1.04151e-05	4.98233	0.0208	1.68194"	0.01	0.603667	0.648389	0.69197	0.728597
rs28495356	0.61807	1.66321e-05	4.77905	0.0302	1.51999"	0.05
rs34569694	0.859855	6.00703e-13	12.2213	0	inf"	0.0001
rs28656080	0.617562	1.69774e-05	4.77013	0.0309	1.51004"	0.05
rs28530648	0.617562	1.69774e-05	4.77013	0.0309	1.51004"	0.05
rs12661707	-0.652951	3.70805e-06	5.43085	0.0089	2.05061"	0.01
rs9269329	0.853601	1.32681e-12	11.8772	0	inf"	0.0001
rs9269491	0.848833	2.36965e-12	11.6253	0	inf"	0.0001
rs9269637	-0.618846	1.61179e-05	4.79269	0.0292	1.53462"	0.05
rs3830135	0.629417	1.04151e-05	4.98233	0.0208	1.68194"	0.05
rs9270207	-0.635234	8.13351e-06	5.08972	0.0163	1.78781"	0.05
rs9270467	0.853601	1.32681e-12	11.8772	0	inf"	0.0001
rs28605404	0.629417	1.04151e-05	4.98233	0.0208	1.68194"	0.05
rs9270856	0.853601	1.32681e-12	11.8772	0	inf"	0.0001
rs9271100	0.853601	1.32681e-12	11.8772	0	inf"	0.0001
rs9271170	0.853601	1.32681e-12	11.8772	0	inf"	0.0001
rs4530903	0.629417	1.04151e-05	4.98233	0.0208	1.68194"	0.05
rs34217071	0.629417	1.04151e-05	4.98233	0.0208	1.68194"	0.05
rs35632780	0.629417	1.04151e-05	4.98233	0.0208	1.68194"	0.05
rs10484561	0.617562	1.69774e-05	4.77013	0.0309	1.51004"	0.05
rs35998847	0.617562	1.69774e-05	4.77013	0.0309	1.51004"	0.05
